# Supplementary material
Source: Springer Nature journal article supplement (https://www.springermedizin.de/resource/supplementary/12889_2013_6117_MOESM2_ESM.pdf/9494392)

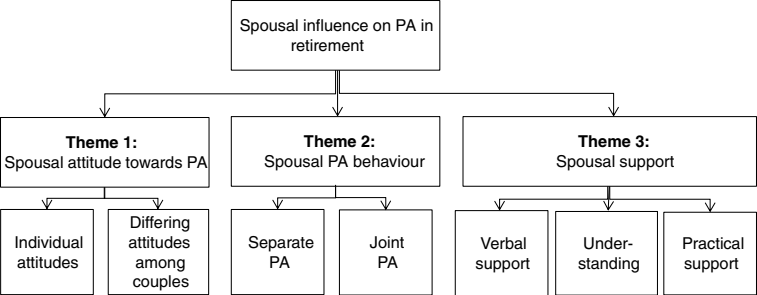

Abbreviation: PA, physical activity

Supplement: MOESM2 [file 9494392]
